# Supplementary material
Source: PubMed Central journal article supplement (PMC8223943)
Supplement: jvi.00589-21-s0001.pdf [file jvi.00589-21-s0001.pdf]

**Table S1. List of primers used in the study.**

| Construct                                       | Abbreviation                  | Primer sequence (5' to 3')                                                                                                                                                                                                                                               |
|-------------------------------------------------|-------------------------------|--------------------------------------------------------------------------------------------------------------------------------------------------------------------------------------------------------------------------------------------------------------------------|
| p2300-NP                                        | NP                            | F: GAGCTCATGGGTACCAACAAGCCAG<br>R: GGATCCCTAGTCATCTGCACCTTCTGC                                                                                                                                                                                                           |
| p2300-RdRp <sup>wt</sup>                        | RdRp <sup>wt</sup>            | F: GAGAGGTCGCGAGCTCGGTACCATGACGACACCACCTCTCGTTATACC<br>R: GCATGCCTGCAGGTCGACTCTAGATCAGAAATCGAACTTATGGTC                                                                                                                                                                  |
| p2300-RdRp <sup>opt</sup>                       | RdRp <sup>opt</sup>           | F: GAGAGGTCGCGAGCTCGGTACCATGACTACCCCTCTCTTTGTG<br>R: GCATGCCTGCAGGTCGACTCTAGACTAGAAGTCGAACCTGTGATC                                                                                                                                                                       |
| pCXSN-NSs                                       | NSs                           | F: CTCGGTACCATGCTTCAAGTGTATGAG<br>R: GACTCTAGATTATTTGATCCTGAAGCATATG                                                                                                                                                                                                     |
| pBIN-NS3                                        | NS3                           | F: CTCGGTACCATGAACGTGTTACATCGTC<br>R: AGTCTAGACTACAGCACAGCTGGAGAGC                                                                                                                                                                                                       |
| pCXSN-NSvc4                                     | NSvc4                         | F: CTCGGTACCATGGCTTGTCTCGACTTTTG<br>R: GACTCTAGACTACATGATGACAGAACTTC                                                                                                                                                                                                     |
| pCB301-HH-RNA1 <sub>(-)</sub> -RZ-NOS           | RNA1 <sub>(-)</sub>           | F: GGAATATCTTCCTATAGTCACACAAAGTCCAGAGGAAAAACAAAATG<br>R: GTGGAGATGCCATGCCGACCCACACATAAGTCAGAGGAAAAATAATTTTG<br>F <sup>a</sup> : CAAAATTATTTTTCTCTGACTATGTGTGGGTCGGCATGGCATCTCCAC<br>R <sup>a</sup> : CATTTGTTTTCTCTGGACTTTGTG TACTATAGGAAGATATTCC                        |
| pCB301-HH-RNA2 <sub>(-)</sub> -RZ-NOS           | RNA2 <sub>(-)</sub>           | F: GGAATATCTTCCTATAGTCACACAAAGTCTGGGTATATAAGCCAC<br>R: GTGGAGATGCCATGCCGACCCACACAAAGTCTGGGTATAAATCTTCTCG<br>F <sup>a</sup> : GAAGAAGTTATACCCAGACTTTGTGTGGGTCGGCATGGCATCTCCAC<br>R <sup>a</sup> : GTGGCTTATATACCCAGGACTTTGTGTGACTATAGGAAGATATTCC                          |
| pCB301-HH-RNA3 <sub>(-)</sub> -RZ-NOS           | RNA3 <sub>(-)</sub>           | F: CGAAACTATAGGAATATCTTCCTATAGTCACACAAAGTCTGGGTAATAAATTTTC<br>R: GGTGGAGATGCCATGCCGACCCACACAAAGTCTGGGTAATAAATTTTC<br>F <sup>a</sup> : GAAAATTTTATACCCAGACTTTGTGTGGGTCGGCATGGCATCTCCACC<br>R <sup>a</sup> : GTTTCGGCCTTTCGGCCTCATCAGACACAAAGAGGCTCTCCAAATGAAATG           |
| pCB301-HH-RNA3 <sub>(+)</sub> -RZ-NOS           | RNA3 <sub>(+)</sub>           | F: CGAAACTATAGGAATATCTTCCTATAGTCACACAAAGTCTGGGTAATAAATTTTC<br>R: GAGGTGGAGATGCCATGCCGACCCACACAAAGTCTGGGTAATAAATTTTAC<br>F <sup>a</sup> : CTATTTTACCCAGACTTTGTGTGGGTCGGCATGGCATCTCCACC<br>R <sup>a</sup> : GAAAATTTTATACCCAGACTTTGTGTGACTATAGGAAGATATTCTATAGTTTCG         |
| pCB301-HH-RNA4 <sub>(-)</sub> -RZ-NOS           | RNA4 <sub>(-)</sub>           | F: GGAATATCTTCCTATAGTCACACAAAGTCCAGGGCATTGTACAACG<br>R: GGTGGAGATGCCATGCCGACCCACACAAAGTCCAGGCATATCTTTTGAG<br>F <sup>a</sup> : CTCAAAAGATATGCCCTGACTTTGTGTGGGTCGGCATGGCATCTCCACC<br>R <sup>a</sup> : CGTTGTACAAATGCCCTGGACTTTGTGTGACTATAGGAAGATATTCC                      |
| pCB301-HH-RNA3 <sub>(-)</sub> GFP-RZ-NOS        | MR3 <sub>(-)</sub> GFP        | F: CCACAACACTGATTTGTTTCAGTTTACTTGTACAGCTCGTCCATGCCGAGA<br>R: CATTCTCCAGTACCTCTTGTAGAAATGGTGAGCAAGGGCGAGGAGCTGTTT<br>F <sup>a</sup> : GAACAGCTCCTCGCCCTTGCTCACCATTCTAGCAAGAGGACTGGAGGAATG<br>R <sup>a</sup> : TCTCGCATGGACGAGCTGTACAAGTAACTGAACAAATCAGTAGTTGTGG           |
| pCB301-HH-RNA3 <sub>(+)</sub> GFP-RZ-NOS        | MR3 <sub>(+)</sub> GFP        | F: CATTCTCCAGTACCTCTTGTAGAAATGGTGAGCAAGGGCGAGGAGCTGTTT<br>R: CCACAACACTGATTTGTTTCAGTTTACTTGTACAGCTCGTCCATGCCGAGA<br>F <sup>a</sup> : TCTCGCATGGACGAGCTGTACAAGTAACTGAACAAATCAGTAGTTGTGG<br>R <sup>a</sup> : GAACAGCTCCTCGCCCTTGCTCACCATTCTAGCAAGAGGACTGGAGGAATG           |
| pCB301-HH-RNA3 <sub>(-)</sub> Cherry&GFP-RZ-NOS | MR3 <sub>(-)</sub> Cherry&GFP | F: CAATACAATTCCGACATCATTAAGTATGGTGAGCAAGGGCGAGGAGGATAAC<br>R: TCTTTCTTTTTCTTTTCTTTTCTTTTATTTTAAGATCTGTACAGCTCGTCCATGC<br>F <sup>a</sup> : GCATGGACGAGCTGTACAGATCTTAAAAATAAAGGAAAAAGAAAAAAGAAAAAG<br>R <sup>a</sup> : GTTATCTCTCGCCCTTGCTCACCATACTTAGATGATGTCGGAATTGTATTG |

|                                                               |                                            |                                                                                                                                                                                                                                                                         |
|---------------------------------------------------------------|--------------------------------------------|-------------------------------------------------------------------------------------------------------------------------------------------------------------------------------------------------------------------------------------------------------------------------|
| pCB301-HH-RNA3 <sub>(c)</sub> eGFP <sup>NS3</sup> -RZ-NOS     | MR3 <sub>(c)</sub> eGFP <sup>NS3</sup>     | F: AAATAAAGGAAAAAGAAAAAGAAAAAGAAAAACAAATAATC<br>R: GGTGGAGATGCCATGCCGACCCACACAAAGTCTGGGTAATAAAAATTTTC<br>F <sup>a</sup> : GAAAATTTTATTACCCAGACTTTGTGTGGGTCGGCATGCCATCTCCACC<br>R <sup>a</sup> : TTTTCTTTTTCCTTTTATTACTTAGATGATGTCGGAATTGTATTG                           |
| pCB301-HH-RNA3 <sub>(c)</sub> eGFP <sup>NS3stop</sup> -RZ-NOS | MR3 <sub>(c)</sub> eGFP <sup>NS3stop</sup> | F: CAATCCGACATCATCTAAGTATGTAAGTGTTCACATCGTCTG<br>R: GGTGGAGATGCCATGCCGACCCACACAAAGTCTGGGTAATAAAAATTTTC<br>F <sup>a</sup> : GAAAATTTTATTACCCAGACTTTGTGTGGGTCGGCATGCCATCTCCACC<br>R <sup>a</sup> : GACGATGTGAACACTTACATACTTAGATGATGTCGGAATTG                              |
| pCB301-HH-RNA3 <sub>(c)</sub> eGFP <sup>Mut1</sup> -RZ-NOS    | MR3 <sub>(c)</sub> eGFP <sup>Mut1</sup>    | F: CAATACAATTCCGACATCATCTAAGTAAATTTGACAATAGG<br>R: TCTTTTCTTTTTCTTTTCCTTTTATTCTACAGCACAGCTGGAGAGC<br>F <sup>a</sup> : GCTCTCCAGCTGTGCTGTAGAAATAAAAGGAAAAAGAAAAAGAAAAAGA<br>R <sup>a</sup> : ACTTAGATGATGTCGGAATTGTATTGTATAGTAAAAATA                                     |
| pCB301-HH-RNA3 <sub>(c)</sub> eGFP <sup>Mut2</sup> -RZ-NOS    | MR3 <sub>(c)</sub> eGFP <sup>Mut2</sup>    | F: CAATACAATTCCGACATCATCTAAGTTTCTTCACTGAAGTGAAGCC<br>R: TCTTTTCTTTTTCTTTTCCTTTTATTGACAGGCTTCCATCATGGTCAG<br>F <sup>a</sup> : AAATAAAGGAAAAAGAAAAAGAAAAAGAAAAAGAAAAACAAATAATC<br>R <sup>a</sup> : GGCTTCACCTCAGTGAAGAACTTAGATGATGTCGGAATTGTATTG                          |
| pCB301-HH-RNA3 <sub>(c)</sub> eGFP <sup>Mut3</sup> -RZ-NOS    | MR3 <sub>(c)</sub> eGFP <sup>Mut3</sup>    | F: CAATACAATTCCGACATCATCTAAGTATTGATGAGCATCAG<br>R: TCTTTTCTTTTTCTTTTCCTTTTATTTTTTCACATAAGAGGATGACATC<br>F <sup>a</sup> : AAATAAAGGAAAAAGAAAAAGAAAAAGAAAAAGAAAAACAAATAATC<br>R <sup>a</sup> : ACTTAGATGATGTCGGAATTGTATTGTATAGTAAAAATA                                    |
| pCB301-HH-RNA3 <sub>(c)</sub> eGFP <sup>Mut4</sup> -RZ-NOS    | MR3 <sub>(c)</sub> eGFP <sup>Mut4</sup>    | F: CAATACAATTCCGACATCATCTAAGTATGAACGTGTTAC<br>R: TCTTTTCTTTTTCTTTTCCTTTTATTGGAGGGGTGCC<br>F <sup>a</sup> : AAATAAAGGAAAAAGAAAAAGAAAAAGAAAAAGAAAAACAAATAATC<br>R <sup>a</sup> : ACTTAGATGATGTCGGAATTGTATTGTATAGTAAAAATA                                                  |
| pCB301-HH-RNA1 <sub>(c)</sub> eGFP-RZ-NOS                     | MR1 <sub>(c)</sub> eGFP                    | F: GTCCCTTTGTTGAAGAGGACTTCTTACTTGTACAGCTCGTCCATGCCGAGA<br>R: GATTTTGTTTTCCACAAAAGAAATGAAGGATGGTGAGCAAGGGCGAGGAGCTGTTC<br>F <sup>a</sup> : GAACAGCTCCTCGCCCTTGCTCACCATCCTCAATCTTTTGTGGAAAACAAAATC<br>R <sup>a</sup> : TCTCGGCATGGACGAGCTGTACAAGTAAGAAGTCTCTTCAACAAAGGGAC |
| pCB301-HH-RNA2 <sub>(c)</sub> eGFP-RZ-NOS                     | MR2 <sub>(c)</sub> eGFP                    | F: CATAATGAATGAACCTATTGGCTTACTTGTACAGCTCGTCCATGCCGAGA<br>R: GTCTGGGTATAACTTCTCGAAGATGGTGAGCAAGGGCGAGGAGCTGTTC<br>F <sup>a</sup> : GAACAGCTCCTCGCCCTTGCTCACCATCTCGAAGAAGTTATACCCAGAC<br>R <sup>a</sup> : TCTCGGCATGGACGAGCTGTACAAGTAAGCCAATAGTTCATTATGTATG               |
| pCB301-HH-RNA4 <sub>(c)</sub> eGFP-RZ-NOS                     | MR4 <sub>(c)</sub> eGFP                    | F: CATACTCCGGAAGTGTATCTCACTTACTTGTACAGCTCGTCCATGCCGAGA<br>R: GATTAAGCTAATATATACTTTAATTATGGTGAGCAAGGGCGAGGAGCTGTTC<br>F <sup>a</sup> : GAACAGCTCCTCGCCCTTGCTCACCATAATTAAGTATATATTAGCTTAATC<br>R <sup>a</sup> : TCTCGGCATGGACGAGCTGTACAAGTAAGTGAGATAACCAGTTCGGAGTATG      |
| pGEM-eGFP                                                     | -                                          | F: ATGGTGAGCAAGGGCGAGGAGCTGTTC<br>R: TTAAGTGTACAGCTCGTCCATGCCGAGA                                                                                                                                                                                                       |
| pGEM-anti-eGFP                                                | -                                          | F: TTAAGTGTACAGCTCGTCCATGCCGAGA<br>R: ATGGTGAGCAAGGGCGAGGAGCTGTTC                                                                                                                                                                                                       |
| pGEM-NS3                                                      | -                                          | F: CATGGCGCCGCGGAATTCGATTATGAACGTGTTACATCGTC<br>R: CAGGCGCCGCGAATTCAGTAGTATACAGCACAGCTGGAGAGC                                                                                                                                                                           |
| pGEM-antiNS3                                                  | -                                          | F: CATGGCGCCGCGGAATTCAGTCTACAGCACAGCTGGAGAGC<br>R: CAGGCGCCGCGAATTCAGTAGTATGAACGTGTTACATCGTC                                                                                                                                                                            |

<sup>a</sup> Forward and reverse primers were used to amplified the linearized pCB301 vectors by PCR.

**Table S2. The predicted intron splicing sites of wild-type RdRp gene.**

| Position (bp) |      |      |      |      |      |      |
|---------------|------|------|------|------|------|------|
| 40            | 1233 | 2741 | 4107 | 5500 | 6655 | 7576 |
| 114           | 1258 | 2747 | 4113 | 5550 | 6678 | 7614 |
| 121           | 1275 | 2806 | 4195 | 5607 | 6682 | 7633 |
| 235           | 1293 | 2865 | 4246 | 5737 | 6708 | 7664 |
| 268           | 1313 | 2983 | 4378 | 5771 | 6750 | 7683 |
| 271           | 1369 | 3088 | 4558 | 5784 | 6817 | 7684 |
| 298           | 1385 | 3171 | 4567 | 5887 | 6829 | 7698 |
| 361           | 1536 | 3183 | 4612 | 5931 | 6930 | 7699 |
| 477           | 1558 | 3204 | 4624 | 6055 | 6944 | 7774 |
| 647           | 1654 | 3281 | 4662 | 6076 | 6948 | 7825 |
| 686           | 1675 | 3289 | 4692 | 6099 | 6961 | 7898 |
| 771           | 1767 | 3319 | 4738 | 6139 | 6972 | 7953 |
| 829           | 1806 | 3390 | 4783 | 6160 | 6998 | 7959 |
| 855           | 1861 | 3458 | 4801 | 6163 | 7034 | 8068 |
| 857           | 1887 | 3589 | 4869 | 6180 | 7179 | 8096 |
| 1015          | 1944 | 3640 | 4970 | 6228 | 7255 | 8113 |
| 1018          | 1965 | 3706 | 5023 | 6255 | 7307 | 8134 |
| 1033          | 1977 | 3712 | 5124 | 6360 | 7352 | 8187 |
| 1068          | 2114 | 3784 | 5180 | 6364 | 7457 | 8317 |
| 1087          | 2233 | 3791 | 5215 | 6399 | 7458 | 8346 |
| 1131          | 2353 | 3828 | 5250 | 6412 | 7482 | 8513 |
| 1132          | 2365 | 3940 | 5251 | 6426 | 7486 | 8573 |
| 1163          | 2385 | 3984 | 5277 | 6469 | 7509 | 8595 |
| 1164          | 2398 | 4014 | 5292 | 6476 | 7517 | 8648 |
| 1171          | 2437 | 4066 | 5386 | 6510 | 7546 | 8682 |
| 1176          | 2568 | 4090 | 5440 | 6555 | 7552 | 8704 |
| 1180          | 2709 | 4106 | 5498 | 6576 | 7568 |      |

The putative 188 intron splicing sites (ISSs) of wild-type RdRp gene sequence were predicted by Alternative Splice Site Predictor (ASSP) (<http://wangcomputing.com/assp/>).

**Table S3. Optimized RdRp gene sequence used in the study.**

ATGACTACCCCTCCTTGTGATTCTTTCATGTGCACGGTAGGTCTTACGAGCTTCTTGCTGGTTACCATGAGGTGGACTG  
GCAAGAGATTGAGGAAGTGAAGAGACTGATGTGAGAGGTGATGGCTTCTGCCTGTACCCTCTATCCTTTACTCTATGGGC  
CTGAGCAAAGAGAAGTCTAGGACCACCGAGTTCATGATCAAGCTGAGGTCTAACCTGCTATCTGCCAGCTGGATCAAGAG  
ATGCAGCTGTCTTATGAAGCAGCTGGACCCGAACGATTCTTCTGCTTGGGGTGAAGATATCGCCATCGGCTTCATGGCTAT  
CATCCTGCGGATCAAGATTATCGCCTACCAGACCGTGGATGGCAAGCTGTTCAAGACTATCTACGGTGCAGTTCGAGAGC  
ACCATCAGGATTAGGAAGTACGGCAACTACCACTTCAAGAGCCTCGAGACTGATTTCCAGCCAAAGTGAAGCTCCGGTCC  
AAGATTGAAGAGTTCCTTCGGATGCCTGTTGAGGACTGCGAGTCTATTCTCTGTGGCAGCTTCTGTGTACAAGCCGATCG  
TGTCTGATTCTCTGAGCGGCCACAAGAGCTTCAGCAATGTGGATGAGCTGATCGGCAGCATCATCAGCAGCATGTACAAGAT  
CATGGACAACGGCGATCAGTGTCTTCTGTGGTCTGCTATGAGAATGATCGCTCGGCCTTCTGAGAAGCTTTACGCTCTTGCT  
GTGTTCTGGGCTTCAACCTGAAGTCTTACCATGTGAGAAAGCGGGCAGAGAAGCTTACCCTAAGTTGGAGTCTGATCAC  
ACCAACCTGGGTGTGAAGCTTATCGAGGTTTACGAGGTGTCAGAGCCTACTAGGTCTACTTGGGTTTTGAAGCCTGGTGGCT  
CTCGGATTACTGAGACTAGGAAGTTCGTGATCGAAGAGATCATCGATAACCGGCGGAGCCTTGAGTCTCTGTTCCGTGTCATC  
TTCTAACTACCCTGCCGAGCTGTGCTCTCAGAAGCTTTCTGCTATCAAGGACCGGATCGCTCTGATGTTCCGGCTTTATTAACA  
GGACCCTGAGAACAGCGGTCTGTGAGCTTTACATCAACACCTACTACCTGAAGCGGATCCTCCAGGTGGACAGAAATGTGA  
TCAGGGACTCTTTAGGTCACAGCCTGCTGTGGGTATGATCCAGATTATTAGGCTGCCTACCGCTTTCCGGCACTTACAATCCT  
GAGGTTGGGACCTTTTGCTTGCTCAGACTGGTCTTATCTACAGGCTTGGTACTACTACCCGGGTGCAGATGGAAGTTAGAA  
GGTCCCATCTGTGATCAGCCGGTACACACAAGATCACTAGCTTCCCCGAGACTCAGAAGCACAACAACCTGTACGACT  
ACGCTCCGAGGACTCAAGAGACTTTCTACCATCCTAACGCCGAGATCTACGAGGCTGTGGATGTTAAGACCCCTTCCGTGAT  
TACCAGATCGTCGACAACCACATCGTGATTAAGTGAACACCGACGACAAAGGCTGGTCCGTGAGCGATTCTATCAAGCA  
GGATTCGTGTACCGGAAGCGGCTGATGGACGCTAAGAATATTGTGCACGACTTCTGTGTTGACATCTGTCTACCGAGACT  
GACAAGTCCTCAAGGGTGTGATCTGAGCATCGGCGGTATCTCTGATAACTGGTCCCCTGACGTGATCATCAGCCGTGAAT  
CTGATCCACAGTACGAGGACATTGTGGTGTACGAGTTCACTACCAGGTCCACCGAGTCTATCGAGTCTTCTTGAGATCCGT  
CGAGGTGAAGTCCCTGAGATACAAAGAGGCTATCCAAGAGAGGGCTATCACCTGAAGAAGAGGATCAGCTACTACCCAT  
CTGCGTGAGCCTTGATGCTGTGGCTACCAACCTTCTTTCTGCTGCTGATGTGTGCAGAGAGCTTATCATTAGGCTCAGGG  
TTGCCAACCAGGTGAAGATTGAGCTGGCTGACAACGACATCAACCTGGATTCTGCTACCCTTCTGGCTCCTGACATCTACCG  
TATCAAAGAGATGTTCCGAGAGAGCTTCCCGAACAACAAGTTCATTACCCGATCACCAAAGAAATGTACGAGCACTTCGT  
GAACCCATGATCAGCGGCGAGAAGGATTATGTGGCTAACCTCAAGTCCATCATCGACAAAGAGACTAGGGACGAGCAGCG  
GAAGAACCTCGAGTCTTTGAAGGTTGTGGACGGGAAGAAGTACACCGAGAGGAAGGCTGAAACTGCCCTGAATGAGATGT  
CTCAGGCTGAGGAACACTACCGGTCTACTTCGAGAACGACAACCTCCGGTCTACCTTGAAGGCTCCTGTTGAGCTGCCTCT  
GATCATCCCTGATGTGCTCTCAGGACAACAGTTCAGCAACAAGAGCTGAGCGACCGGATCCGTAAGAAGCCTATTGAT  
CACCCATCTACAACATCTGGGACCAAGCTGTGAACAAGCGGAAGTCTTATTGCTCTTGGTACCTGGATGAGTTGGAGA  
TCTCTATGCTTGAGGGCAAGTGGCCAAGAAGGTGGAAGAGTCTTACAAGAAGGACCGGTCACAGTACAACAGGACCACC  
TTGCTTACCAACATGAAGGAAGATATCTACCTGGCCGAGAGGGGATCAATGCTAAGAAGAGGCTTGAGGAACCGGACGTC  
AAGTCTACAGGGATCAAAGCAAGCGGCTTTCCATCCTTCTGCTGTCAGAGACAAGGGACATCGAGCAGTTCCTCAGAAA  
GAATGCCTCGAGCTGAACGAAGAGTCTGGTCACTGCTCTCATCAACGTCGAGGATCTTGTGCTGTCTGCTCTTGAGCTTC  
ACGAGGTTGGAGATTGGAGCACCTGTGGAACAACATCAAGGCCACTCTAAGACCAAGTTCGCTCTGTACGCCAAGTTCA  
TCTCTGATCTTGCTACCGAGCTGGCCATCTCTGTCTCAGAATTGCAAAGAGGACACCTACGTCGTAAGAAGCTGAGGGA  
CTTCTTGTGCTACGTGCTGATCAAGCCTGTGAACCTGAAGAGTAACGTGTTCTTCTCCCTGTACATCCCGTCCAACATCTACA  
AGTCTACAACACTACCTTCAAGACCTGATCGGCTCTCTGAGTCTGGTTACATGACCGATTTCCGTGAGCGCCAACGTGAG  
CAAGCTTGTGAATTGGGTTAGATGCGAGGCTATGATGCTGGCCCAAAGAGGATTTGGAGAGAGTTTACGCTGTGCCCCCT  
TCTATCGAAGAACAGGATGGTATGGCTGAGCCAGAGTCTGTTGCCAGATGATGCTTGGACCTTCTGATCCTGCTGAACG  
ATAAGCACCAGCTTGAAGAGATGATCACCGTGTCCAGATTCTCCACATGGAAGGCTTCGTTACTTTCCCTGCTTGGCCATA  
CCCGTACAAGATGTTGACAAGCTGTCTGTGACTCCGAGGTCTAGACTTGAGTGCCTTGTGATCAAGCGGCTCATCATGCTG

ATGAAGCACTACAGCGAGAACCCGATCAAGTTTATGATCGAGGACGAGAAGAAGAAGTGGTTCGGCTTCAAGAATATGTC  
CTGCTGGACTGCAACGGCAAGCTCGCTGATCTTTCTGATCAGGACCAGATGCTGAACCTGTTCTACCTGGGTACCTGAAGA  
ACAAGGACGAAGAGGTGCGAGGATAACGGTATGGGTGAGCTTCTGACCAAGATCCTGGGATTCGAGTCAGCTATGCCTAAGA  
CCAGGGATTTCTGGGCATGAAGGATCCTGAGTACGGCACCATTAAGAAGCACGAGTTCTCCATCAGCTACGTGAAGGATCT  
GTGCGACAAGTTCCTGGACAGGCTGAAGAAAACCCACGGCATTAAAGACCCTATTACCTACCTGGGCGACAAGATCGCTAA  
GTTCTTGAGCACCCAGTTCATCGAGACTATGGCTAGCCTGAAGGCCAGCTCTAACTTCAGCGAGGATTACTACCTGTACACC  
CCTTCTAGGCGGCTCAAGAATCAAGAACAGAGCCGGTCTAAGCACGTGATCGATGCTGGTGGTAACATCAGCGCTTCAGTG  
AAGGGTAAGCTGTACCACAGGTCTAAGGTGATCGAGAAGCTCACTACCCTGATCAAGGATGAGACTCCGGGCAAAGAAGT  
AAGATCGTGGTGGATCTTCTGCCGAAGGCTATGGAAGTGTGAACAAGAACGAGTGCATGCATATCTGCATCTTCAAGAAGA  
ACCAGCACGGCGTCTGCGAGAGATCTATGTGCTTAACTCTTCGAGCGGATCATGCAAAAGACCGTCGAGGACTTCAGCA  
GGGTATTCTTGAGTGTGCCGTCTGAGACTATGACCTCTCAAAGAACAAGTTTCGGATCCCCGAGCTGCACAACATGGA  
AGCTAGAAAGACCCTCAAGAATGAGTATATGACCATCAGCACCAGCGACGACGCTCTAAGTGAATCAGGGACATTACGT  
GTCAAAGTTTATGTGCATGCTCTGAGGCTGACCCGACTTACTACCATGGTTTTTTGGTTCAGGCTCTGCAGCTGTGGCACC  
ACAAGAAGATTTTCTGGGAGATCAGCTGCTGCAGCTTTTCAACCAGAACGCCATGCTTAACACCATGGACACCACCTTGAT  
GAAGGTGTTCCAGGCTTACAAGGGCGAGATTCAGGTTCCATGGATGAAGGCTGGCCGTAGCTATATCGAAACCGAGACAGG  
TATGATGCAGGGCATTCTGCACTACACCTCTTCTGTTCACGCCATTTTTCTGGACCAGCTTGCTGAAGAGTGGCCGGCTG  
ATATCAACCGGGCTATTAAGACCATCAACAACAAGAAAACGAGAAGGTGAGCTGCATCGTGAACAATATGGAAGCTCCG  
ACGACAGCAGTTCATCATCTCTATCCGAACTTCAAAGAGAATGAGGCTGCCAGCTTTACCTTCTGTGCGTGGTGAATAG  
CTGGTTTCGGAAGAAAGAGAAGCTCGGCACCTACCTCGGTATCTACAAGAGCCCTAAGTCTACCACTCAGACCCTGTTCTG  
GATGGAATCAACAGCGAGTTTTTCTTCTCCGGCGACGTGCACAGGCCTACTTTTAGATGGGTTAACGCTGCTGTGCTCATCG  
GCGAGCAAGAAACCTTTCTGGCATTCAAGAGGAACTGAGCAACACCCTCAAGGACGTTATCGAAGGTGGTGAACCTAC  
GCTCTTACCTTCATTGTGCAGGTTGCCAGGCAATGATCCACTACAGAATGCTCGGTTCCAGCGCTTCTTCTGTTTGGCCTGC  
TTACGAGACTCTGCTGAAGAACTCTTACGATCCTGCTCTGGGCTTCTTCTGATGGATAATCCTAAGTGCCTGGTCTGCTGG  
GGTTCAATTAACGTTTGGATTGCCTGCACCACCCTCCTTGGTGAGAAGTACCACGAGATGATCCAAGAGGAAATGAA  
GGCAGAGTCCCAGTCTCTGAAGTCTGTTACCGAGGACACCATTAACACCGGCTTGTGTCTCGGACCACCATGGTTGGTTTT  
GGCAACAAGAAACGGTGGATGAAGCTCATGACCCTCTCAACCTTAGCGCTGACGTGTACGAGAAGATCGAGGAAGAACC  
GCGGGTCTACTTTTTCCATGCTGCTACTGCTGAGCAGATCATCCAGAAAATCGTATCAAGATGAAGTACCGGGCGTGATCC  
AGAGCCTTTCTAAGGGTAATATGCTCGCCCGAAGATCGCCTCTTCAAGTGTCTTCTATTAGCCGGCACATCGTGTTCACCATG  
AGCGCTTATTACGATGCTGACCCTGAGACACGAAAACAGCCTGCTTAAAGAGCTAATCAACAGCTCTAAGATCCCGCAG  
AGGCACGATTACTTGCAAGAGCCACATACTCTCAAGCCGACCAAGGTTGAAGTTGACGAGGATAGCTGGGAGTTCAAGAGC  
GCAAAAGAGGAATGCATCCGGGTTCTCAAGCAGCGGATTAAGATTCACACTGGCCGGGAAGAGAGATCCATCTCCTTGCTT  
TTGAGAACATGGCCAAGAGCATGATCGGTAGGTGCACCGATCAGTACGATGTGAGGGAAAACGTGTCCATTCTTGCTTGGC  
CCCTGAAGATGAACACTCTTAAAGAAGGACGCTGCCCGAACAGATACCTGTTGGATGAGAAGAACCTGGTGTACCC  
GCTGATCGGTAAGAGGTTAGCGTCTACGTCAGAGCGACAAGGTGCACATTGAGATCTCCGAGAAGAAAGAACGGCTGA  
GCACCAAGTTGTCAACATCGATAAGATGAAGGATATCGAGGAAACCCTGTCTCTGCTGTTCCCAAGTACGGTGATTACCT  
GAGCCTGAAAGAGACAATCGACCAGGTCACATTCCAGAGCGCTATCCACAAGGTTAACGAGAGAAGGCGTGTAGGGCTG  
ATGTGCATCTTACTGGTACAGAGGGCTTCTCCAAGCTGCCTATGTATACTGCTGCTGTGTGGGCTGGTTCGACGTTAAGACT  
ATTCTGCTCACGACAGCATCTACCGACCATTTGGAAGGTGTACAAAGAGCAGTACTCTGGCTGAGCGATACCCTGAAAG  
AAACCGTTGAGAAGGGGCTTTCAAGACCGTTCAGGGCTTGTGAACCTCATCTCTAGAGCTGGTGTGCGGTCTAGGGTTG  
TGCATTTGGTTGGTCTTTTCGGCAAGAAGTGCAGGGTCTTATTAACCTGGTGACCGCCATCAAGGACAACTTCTTAAACGG  
GCTTGTGTTCAAGGGCAACATTTTCGATATCAAGGCCAAAAGACCCGTGAGAGCCTGGACAACCTACCTGTCTATCTGCACC  
ACACTTAGCCAGGCTCCTATACCAAGCACGACAAGAACCAGATCCTGCGGTCACTTTTCGTTAGCGGTCTCGGATTCAGT  
ACGTGAGTTCTCAGTTTGGCTCTAGGCGGAACCGGATGTCTATTCTTCAAGAGGTTGTGGCTGACGACCCTACTCTTCATTG  
GCCAGATCAGGATACCAGCCAGAAGCAGCTTGAGGATAAGTTCAGGGAACCTGCCCAAAAGAGTTGCCTTTCTTGACCGA

GAAGGTTTTCCACGACCACCTCGAGAAGATTGAGCAGCTTATGAAAGAAAACACCCACCTCGGTGGCAGGGATGTTGATGC  
TTCTAAGACTCCTTACGTGCTGGCTAGGGCTAACGATATTGAGATCCACTGCTACGAGCTTTGGCGTGAGTATGATGAAGATG  
AGGACGAGGCTTACCAGGCATACTGTTCTGAAGTTGAGGCCGCTATGGACCAAGAAAAGCTGAACGCTCTGATCGAGAGGT  
ATCACGTTGACCTAAGGCCAAGTGGATCCAAATGCTTATGAACGGCGAGATCGAGACTGTGGAAGATTGAACAAGCTGG  
ACAAGGCTTCGAGTCTACAGGTTGGCTCTTGTGAGAGGATTCTGTGGGTAAGCTTGGCATTCTTGGCAGCTATAAAA  
GTGCCAGCAGCGAATCGAGGAACTTGATGGTGAGGGTAACAAGACCCATAGGTACACCGGTGAAGGCATTTGGAGGGGCTC  
ATTCGATGATTCTGACGTGTGCATCGTTGTGCAGGACCTGAAAAGACCAGAGAAAGCTACCTCAAGTGCCTGCTGTTCTCC  
AAGGTTCCGATTACAAGGTTCTGATGGGCCACCTCAAGACTTGGTGCAGGGAACACCATATCAGCAACGATGAGTCCCG  
ACTGTACCCAGAAAGAACTCCTGTCTTACGGCGTGACCAAGTCTCTGTGCTGCTCTACAAGATGAACGGCATGAAGATGC  
TGCGGAACATGAAAAGGGCATCCACTTTACTGGAACCCGAGCCTTTCAACAGGTCCCAGACCTACATTAAGTGGCTGG  
CTGTGGACATCACCGATCACTCACTTAGGCTTAGGAATAGGACCGTCGAAAACGGCAGGGTTGTGAACCAGACTATTATGGT  
GGTGCCGCTGTACAAGACTGACGTGCAGATATTCAAGACCTCTCCGTTGATCTCGAGCAGGATGTTCAGAACGATAGGCTG  
AAGCTTCTGTCAGTGACTAAGGCTGGTGAGCTTAGATGGCTGCAGGACTGGATAATGTGGCGGTCATCTGCTGTGGACGACC  
TCAACATTCTGAATCAGGTCAGGCGTAACAAGGCTGCTAGGGATCATTCAACGCCAAGCCGGAATTCAAGAAGTGGATCA  
AAGAGCTTTGGGACTACGCCCTGGATACCACTCTGATTAACAAGAAAGTGTTCATCACTACCCAGGGCAGCGAGTCTCAGTC  
TACTGTTTCAAGCGGCGATTCCGATTCTGCTGTTGCTCCTTACTGATGAGGCCGTGGATGAGATCCATGACCTGCTTGACA  
AAGAATTGGAGAAGGGGACCCTGAAGCAGATTATCCACGATGCTACCATTGACGCCAGCTGGACATTCCTGCTATTGAGTC  
TTTCTGGCCGAAGAAATGGAAGTGTCAAGTCCAGCCTCGCTAAGTCTCACCCCTGCTTTTGAACCTACGTGCGGTACATG  
ATTCAAGAGATCGGGGTGACCAACTCCGTAGCCTGATCGATAGCTTCAATCAGAAGGACCCGCTCAAGTCCGTGTCCTTGT  
CTATCATCGATCTGAAAGAGGTTTTCAAGTTTCGCTTACCAGGACATCAACGACGCCTACTTCGTTAAGCAAGAGGAAGATCA  
CAAGTTCGACTTCTAG
